# Supplementary material for: Synthesis, magnetic and NMR spectroscopic properties of the MAl5Pt3 series (M = Ca, Y, La–Nd, Sm–Er)
Source: Royal Society of Chemistry journal article supplement (doi:10.1039/d4dt01296h), 2024-01-01
Supplement: d4dt01296h1.pdf [file d4dt01296h1.pdf]

# SUPPORTING INFORMATION

**Stefan Engel,<sup>a</sup> Elias Gießelmann,<sup>a</sup> Lars Schumacher,<sup>b</sup> Yuemei Zhang,<sup>c</sup> Frank Müller,<sup>d</sup>  
and Oliver Janka<sup>a,\*</sup>**

**Synthesis, Magnetic and NMR spectroscopic properties of  
the  $MAI_5Pt_3$  series ( $M = Ca, Y, La-Nd, Sm-Er$ )**

**\*Corresponding author: Oliver Janka**, Inorganic Solid State Chemistry, Saarland University,  
Campus C4 1, 66123 Saarbrücken, Germany, e-mail: [oliver.janka@uni-saarland.de](mailto:oliver.janka@uni-saarland.de)

<sup>a</sup> **Stefan Engel, Elias Gießelmann**, Inorganic Solid State Chemistry, Saarland University,  
Campus C4 1, 66123 Saarbrücken, Germany

<sup>b</sup> **Lars Schumacher**, Institut für Anorganische und Analytische Chemie, Universität Münster,  
Corrensstrasse 28/30, 48149 Münster, Germany.

<sup>c</sup> **Yuemei Zhang**, Department of Chemistry and Physics, Warren Wilson College, Swannanoa,  
NC, 28778, USA.

<sup>d</sup> **Frank Müller**, Experimental Physics and Center for Biophysics, Campus E2 9, 66123  
Saarbrücken, Germany

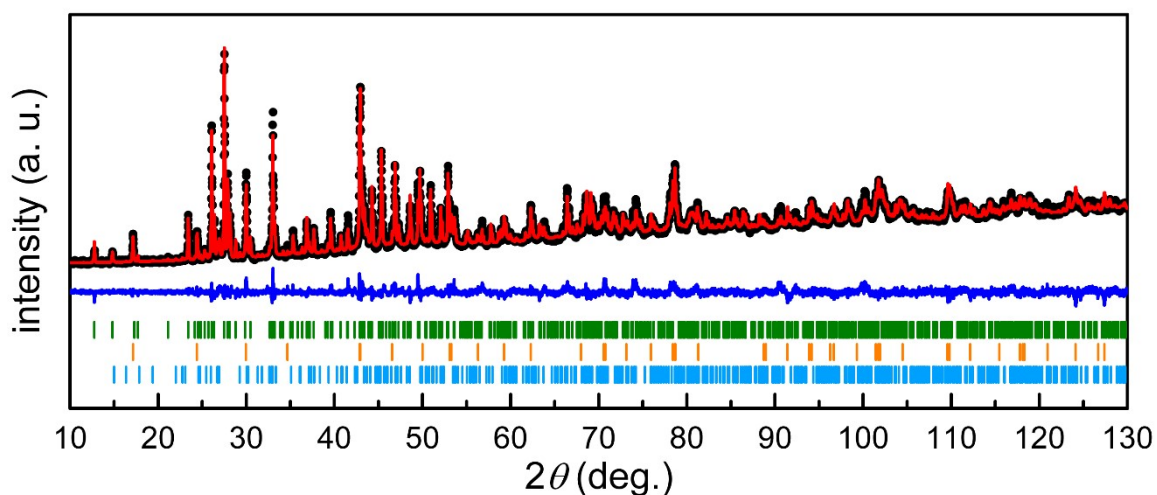

**Figure S1.** Rietveld fit of the powder X-ray diffraction pattern of  $\text{CaAl}_5\text{Pt}_3$ . Experimental data is shown as black dots, the fit as red line, the difference as blue line. The green ticks indicate the Bragg positions for  $\text{CaAl}_5\text{Pt}_3$ , the orange ticks the ones of  $\text{Al}_3\text{Pt}_2$  and the blue ones the ones of  $\text{Ca}_2\text{Al}_{16}\text{Pt}_9$ .

| <b>Refinement details for the data shown in Figure S1</b> |                                                              |                          |                                        |
|-----------------------------------------------------------|--------------------------------------------------------------|--------------------------|----------------------------------------|
| Source                                                    | Bruker D8 ADVANCE (laboratory X-ray)                         |                          |                                        |
| Temperature                                               | RT                                                           |                          |                                        |
| Pressure                                                  | ambient                                                      |                          |                                        |
| Wavelengths                                               | Cu $K\alpha_1$ and Cu $K\alpha_2$ : 154.0596 and 154.4308 pm |                          |                                        |
| Chemical formula                                          | $\text{CaAl}_5\text{Pt}_3$                                   | $\text{Al}_3\text{Pt}_2$ | $\text{Ca}_2\text{Al}_{16}\text{Pt}_9$ |
| Refined amount / wt.-%                                    | 74(1)                                                        | 15(1)                    | 11(1)                                  |
| Space group                                               | $Pnma$                                                       | $P\bar{3}m1$             | $Immm$                                 |
| $a$ / pm                                                  | 2050.35(3)                                                   | 420.75(1)                | 414.03(5)                              |
| $b$ / pm                                                  | 409.04(1)                                                    | 420.75(1)                | 1181.8(2)                              |
| $c$ / pm                                                  | 736.37(1)                                                    | 517.15(1)                | 1830.6(3)                              |
| $V$ / nm <sup>3</sup>                                     | 0.6176                                                       | 0.0783                   | 0.8957                                 |
| $Z$                                                       | 4                                                            | 1                        | 2                                      |
| $d$ -space range                                          | 0.85-14.35 Å (6-130° $2\theta$ )                             |                          |                                        |
| $\chi^2$                                                  | 2.94                                                         |                          |                                        |
| $R_p$ / %                                                 | 3.62                                                         |                          |                                        |
| $R_{wp}$ / %                                              | 4.82                                                         |                          |                                        |
| Definition of $R$ factors                                 | $R_p = \frac{\sum  w I_0 - I_c ^2 }{\sum  wI_0 ^2 }^{1/2}$   |                          |                                        |

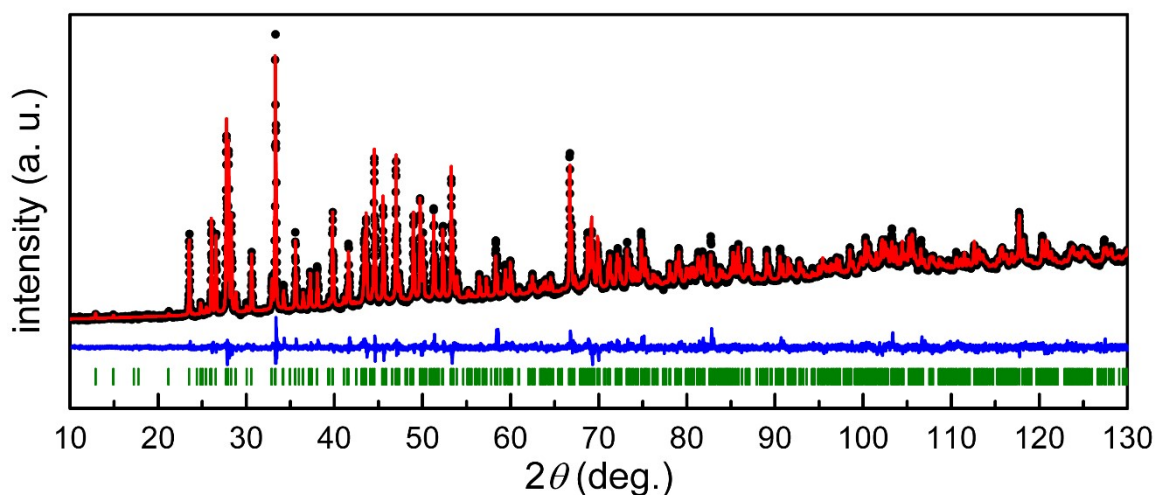

**Figure S2.** Rietveld fit of the powder X-ray diffraction pattern of  $\text{YAl}_5\text{Pt}_3$ . Experimental data is shown as black dots, the fit as red line, the difference as blue line. The green ticks indicate the Bragg positions for  $\text{YAl}_5\text{Pt}_3$ .

| <b>Refinement details for the data shown in Figure S2</b> |                                                              |
|-----------------------------------------------------------|--------------------------------------------------------------|
| Source                                                    | Bruker D8 ADVANCE (laboratory X-ray)                         |
| Temperature                                               | RT                                                           |
| Pressure                                                  | ambient                                                      |
| Wavelengths                                               | Cu $K\alpha_1$ and Cu $K\alpha_2$ : 154.0596 and 154.4308 pm |
| Chemical formula                                          | $\text{YAl}_5\text{Pt}_3$                                    |
| Refined amount / wt.-%                                    | 100                                                          |
| Space group                                               | $Pnma$                                                       |
| $a$ / pm                                                  | 2052.65(2)                                                   |
| $b$ / pm                                                  | 406.75(1)                                                    |
| $c$ / pm                                                  | 728.77(1)                                                    |
| $V$ / nm <sup>3</sup>                                     | 0.6085                                                       |
| $Z$                                                       | 4                                                            |
| $d$ -space range                                          | 0.85-14.35 Å (6-130° $2\theta$ )                             |
| $\chi^2$                                                  | 2.83                                                         |
| $R_p$ / %                                                 | 3.19                                                         |
| $R_{wp}$ / %                                              | 4.24                                                         |
| Definition of $R$ factors                                 | $R_p = \frac{\sum  w   I_0 - I_c ^2}{\sum  w I_0^2 }^{1/2}$  |

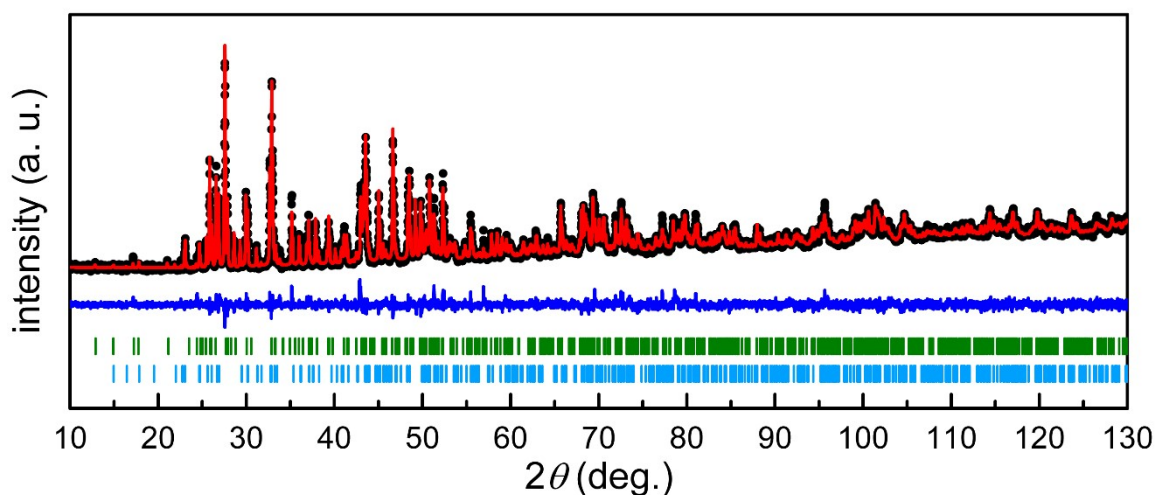

**Figure S3.** Rietveld fit of the powder X-ray diffraction pattern of  $\text{LaAl}_5\text{Pt}_3$ . Experimental data is shown as black dots, the fit as red line, the difference as blue line. The green ticks indicate the Bragg positions for  $\text{LaAl}_5\text{Pt}_3$ , the blue ones the of  $\text{La}_2\text{Al}_{16}\text{Pt}_9$ .

| Refinement details for the data shown in Figure S3 |                                                                                                                                              |                                        |
|----------------------------------------------------|----------------------------------------------------------------------------------------------------------------------------------------------|----------------------------------------|
| Source                                             | Bruker D8 ADVANCE (laboratory X-ray)                                                                                                         |                                        |
| Temperature                                        | RT                                                                                                                                           |                                        |
| Pressure                                           | ambient                                                                                                                                      |                                        |
| Wavelengths                                        | Cu $K\alpha_1$ and Cu $K\alpha_2$ : 154.0596 and 154.4308 pm                                                                                 |                                        |
| Chemical formula                                   | $\text{LaAl}_5\text{Pt}_3$                                                                                                                   | $\text{La}_2\text{Al}_{16}\text{Pt}_9$ |
| Refined amount / wt.-%                             | 68(1)                                                                                                                                        | 32(1)                                  |
| Space group                                        | $Pnma$                                                                                                                                       | $Immm$                                 |
| $a$ / pm                                           | 2068.53(2)                                                                                                                                   | 416.97(1)                              |
| $b$ / pm                                           | 415.48(1)                                                                                                                                    | 1187.41(3)                             |
| $c$ / pm                                           | 732.09(1)                                                                                                                                    | 1828.34(4)                             |
| $V$ / nm <sup>3</sup>                              | 0.6292                                                                                                                                       | 0.9052                                 |
| $Z$                                                | 4                                                                                                                                            | 2                                      |
| $d$ -space range                                   | 0.85-14.35 Å (6-130° $2\theta$ )                                                                                                             |                                        |
| $\chi^2$                                           | 1.90                                                                                                                                         |                                        |
| $R_p$ / %                                          | 4.00                                                                                                                                         |                                        |
| $R_{wp}$ / %                                       | 5.28                                                                                                                                         |                                        |
| Definition of $R$ factors                          | $R_p = \frac{\sum  w   I_0 - I_c ^2}{\sum  w I_0^2 };$ $R_{wp} = \left( \frac{\sum  w   I_0 - I_c ^2}{\sum  w I_0^2 } \right)^{\frac{1}{2}}$ |                                        |

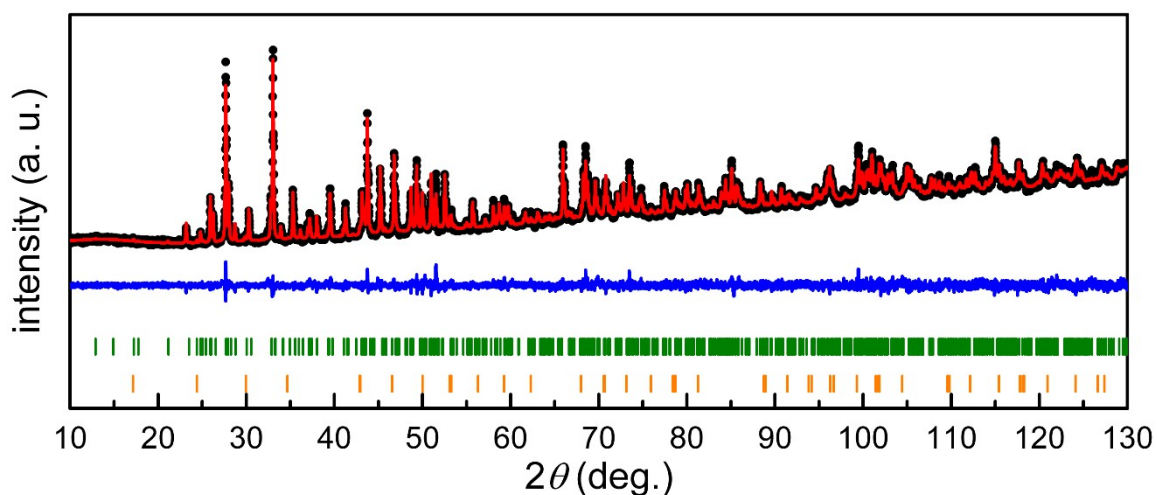

**Figure S4.** Rietveld fit of the powder X-ray diffraction pattern of  $\text{CeAl}_5\text{Pt}_3$ . Experimental data is shown as black dots, the fit as red line, the difference as blue line. The green ticks indicate the Bragg positions for  $\text{CeAl}_5\text{Pt}_3$ , the orange ticks the ones of  $\text{Al}_3\text{Pt}_2$ .

| <b>Refinement details for the data shown in Figure S4</b> |                                                                                                                                         |                          |
|-----------------------------------------------------------|-----------------------------------------------------------------------------------------------------------------------------------------|--------------------------|
| Source                                                    | Bruker D8 ADVANCE (laboratory X-ray)                                                                                                    |                          |
| Temperature                                               | RT                                                                                                                                      |                          |
| Pressure                                                  | ambient                                                                                                                                 |                          |
| Wavelengths                                               | Cu $K\alpha_1$ and Cu $K\alpha_2$ : 154.0596 and 154.4308 pm                                                                            |                          |
| Chemical formula                                          | $\text{CeAl}_5\text{Pt}_3$                                                                                                              | $\text{Al}_3\text{Pt}_2$ |
| Refined amount / wt.-%                                    | 98(1)                                                                                                                                   | 2(1)                     |
| Space group                                               | $Pnma$                                                                                                                                  | $P\bar{3}m1$             |
| $a$ / pm                                                  | 2063.91(2)                                                                                                                              | 421.43(10)               |
| $b$ / pm                                                  | 414.01(1)                                                                                                                               | 421.43(10)               |
| $c$ / pm                                                  | 730.12(1)                                                                                                                               | 517.4(2)                 |
| $V$ / nm <sup>3</sup>                                     | 0.6239                                                                                                                                  | 0.0796                   |
| $Z$                                                       | 4                                                                                                                                       | 1                        |
| $d$ -space range                                          | 0.85-14.35 Å (6-130° $2\theta$ )                                                                                                        |                          |
| $\chi^2$                                                  | 1.58                                                                                                                                    |                          |
| $R_p$ / %                                                 | 3.31                                                                                                                                    |                          |
| $R_{wp}$ / %                                              | 4.38                                                                                                                                    |                          |
| Definition of $R$ factors                                 | $R_p = \frac{\sum  w I_0 - I_c ^2 }{\sum  wI_0 ^2}$ $R_{wp} = \left( \frac{\sum  w I_0 - I_c ^2 }{\sum  wI_0 ^2} \right)^{\frac{1}{2}}$ |                          |

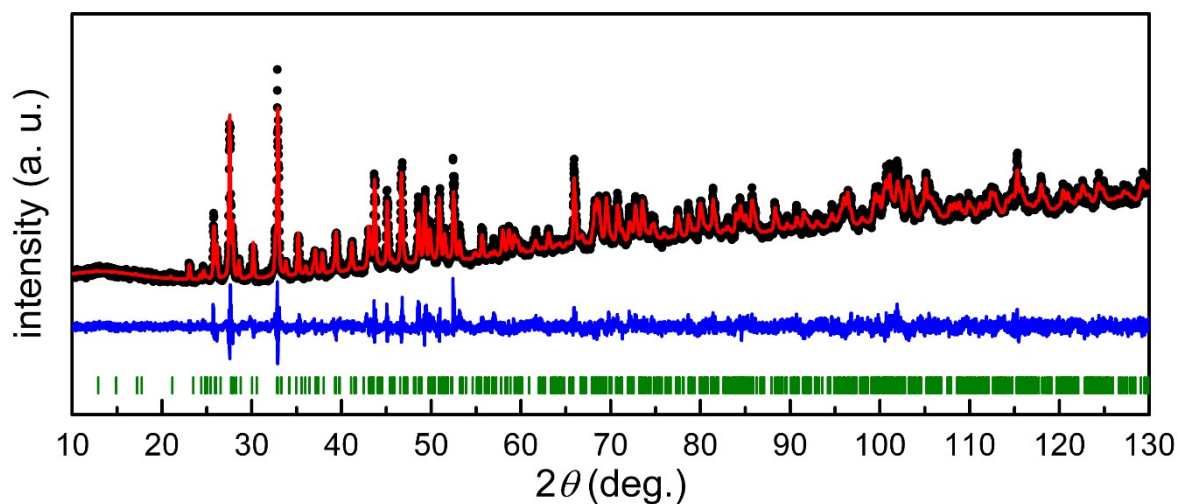

**Figure S5.** Rietveld fit of the powder X-ray diffraction pattern of  $\text{PrAl}_5\text{Pt}_3$ . Experimental data is shown as black dots, the fit as red line, the difference as blue line. The green ticks indicate the Bragg positions for  $\text{PrAl}_5\text{Pt}_3$ .

| <b>Refinement details for the data shown in Figure S5</b> |                                                                              |
|-----------------------------------------------------------|------------------------------------------------------------------------------|
| Source                                                    | Bruker D8 ADVANCE (laboratory X-ray)                                         |
| Temperature                                               | RT                                                                           |
| Pressure                                                  | ambient                                                                      |
| Wavelengths                                               | $\text{Cu } K\alpha_1$ and $\text{Cu } K\alpha_2$ : 154.0596 and 154.4308 pm |
| Chemical formula                                          | $\text{PrAl}_5\text{Pt}_3$                                                   |
| Refined amount / wt.-%                                    | 100                                                                          |
| Space group                                               | <i>Pnma</i>                                                                  |
| <i>a</i> / pm                                             | 2061.43(7)                                                                   |
| <i>b</i> / pm                                             | 412.97(1)                                                                    |
| <i>c</i> / pm                                             | 729.64(2)                                                                    |
| <i>V</i> / nm <sup>3</sup>                                | 0.6212                                                                       |
| <i>Z</i>                                                  | 4                                                                            |
| <i>d</i> -space range                                     | 0.85-14.35 Å (6-130° 2θ)                                                     |
| $\chi^2$                                                  | 2.26                                                                         |
| $R_p$ / %                                                 | 4.14                                                                         |
| $R_{wp}$ / %                                              | 5.53                                                                         |
| Definition of <i>R</i> factors                            | $R_p = \frac{\sum  w   I_0 - I_c ^2}{\sum  w I_0^2 }^{1/2}$                  |

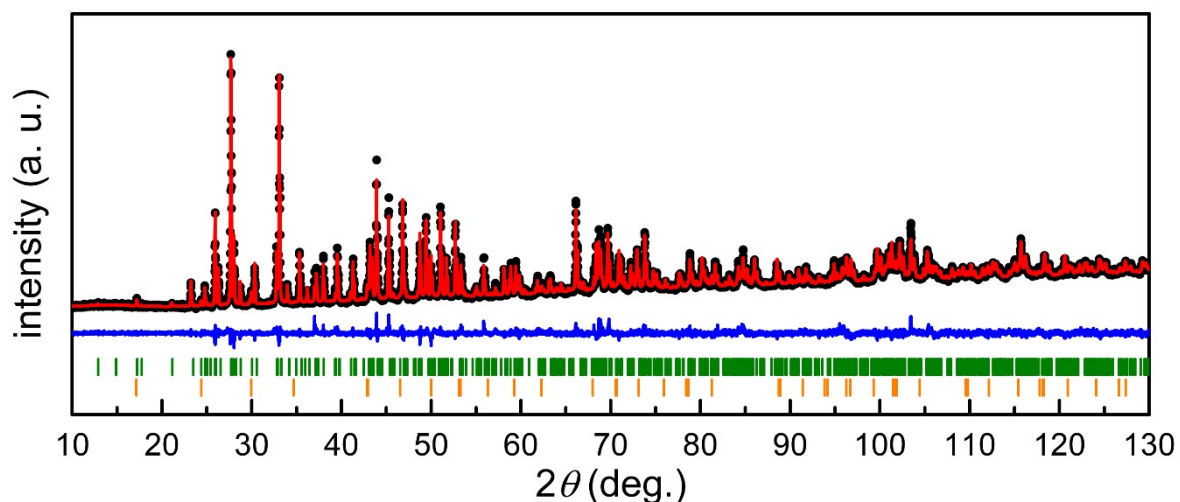

**Figure S6.** Rietveld fit of the powder X-ray diffraction pattern of NdAl<sub>5</sub>Pt<sub>3</sub>. Experimental data is shown as black dots, the fit as red line, the difference as blue line. The green ticks indicate the Bragg positions for NdAl<sub>5</sub>Pt<sub>3</sub>, the orange ticks the ones of Al<sub>3</sub>Pt<sub>2</sub>.

| <b>Refinement details for the data shown in Figure S6</b> |                                                                |                                 |
|-----------------------------------------------------------|----------------------------------------------------------------|---------------------------------|
| Source                                                    | Bruker D8 ADVANCE (laboratory X-ray)                           |                                 |
| Temperature                                               | RT                                                             |                                 |
| Pressure                                                  | ambient                                                        |                                 |
| Wavelengths                                               | Cu K $\alpha_1$ and Cu K $\alpha_2$ : 154.0596 and 154.4308 pm |                                 |
| Chemical formula                                          | NdAl <sub>5</sub> Pt <sub>3</sub>                              | Al <sub>3</sub> Pt <sub>2</sub> |
| Refined amount / wt.-%                                    | 97(1)                                                          | 3(1)                            |
| Space group                                               | <i>Pnma</i>                                                    | $\bar{P}3m1$                    |
| <i>a</i> / pm                                             | 2059.92(1)                                                     | 421.56(3)                       |
| <i>b</i> / pm                                             | 412.05(1)                                                      | 421.56(3)                       |
| <i>c</i> / pm                                             | 729.26(1)                                                      | 515.12(7)                       |
| <i>V</i> / nm <sup>3</sup>                                | 0.6190                                                         | 0.0793                          |
| <i>Z</i>                                                  | 4                                                              | 1                               |
| <i>d</i> -space range                                     | 0.85-14.35 Å (6-130° 2 $\theta$ )                              |                                 |
| $\chi^2$                                                  | 2.22                                                           |                                 |
| <i>R<sub>p</sub></i> / %                                  | 3.49                                                           |                                 |
| <i>R<sub>wp</sub></i> / %                                 | 4.65                                                           |                                 |
| Definition of <i>R</i> factors                            | $R_p = \frac{\sum  w I_0 - I_c ^2 }{\sum  wI_0^2 }$            |                                 |

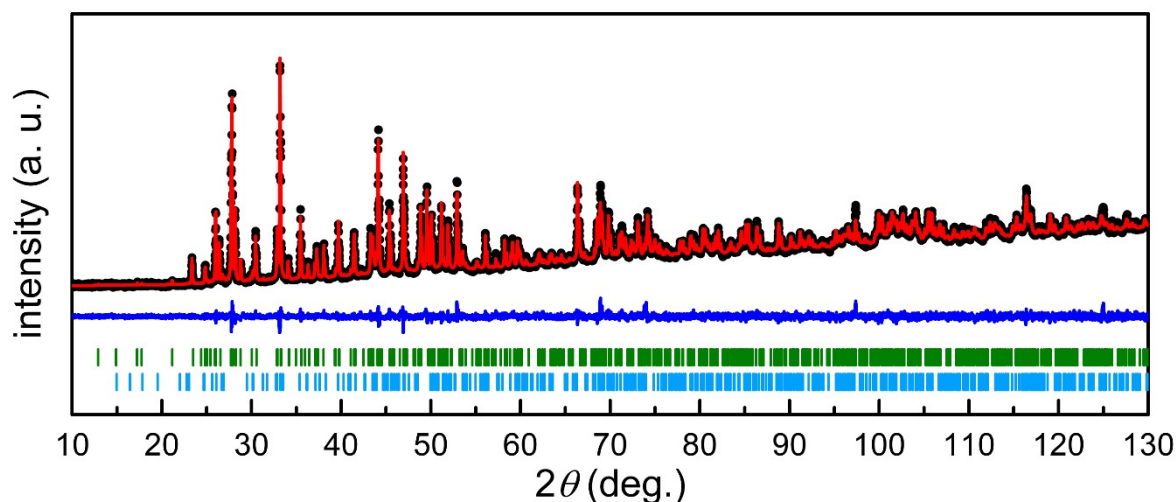

**Figure S7.** Rietveld fit of the powder X-ray diffraction pattern of  $\text{SmAl}_5\text{Pt}_3$ . Experimental data is shown as black dots, the fit as red line, the difference as blue line. The green ticks indicate the Bragg positions for  $\text{SmAl}_5\text{Pt}_3$ , the blue ones the of  $\text{Sm}_2\text{Al}_{16}\text{Pt}_9$ .

| Refinement details for the data shown in Figure S7 |                                                              |                                        |
|----------------------------------------------------|--------------------------------------------------------------|----------------------------------------|
| Source                                             | Bruker D8 ADVANCE (laboratory X-ray)                         |                                        |
| Temperature                                        | RT                                                           |                                        |
| Pressure                                           | ambient                                                      |                                        |
| Wavelengths                                        | Cu $K\alpha_1$ and Cu $K\alpha_2$ : 154.0596 and 154.4308 pm |                                        |
| Chemical formula                                   | $\text{SmAl}_5\text{Pt}_3$                                   | $\text{Sm}_2\text{Al}_{16}\text{Pt}_9$ |
| Refined amount / wt.-%                             | 95(1)                                                        | 5(1)                                   |
| Space group                                        | <i>Pnma</i>                                                  | <i>Immm</i>                            |
| <i>a</i> / pm                                      | 2057.02(2)                                                   | 413.95(7)                              |
| <i>b</i> / pm                                      | 410.24(1)                                                    | 1184.8(2)                              |
| <i>c</i> / pm                                      | 728.52(1)                                                    | 1816.4(4)                              |
| <i>V</i> / nm <sup>3</sup>                         | 0.6148                                                       | 0.8909                                 |
| <i>Z</i>                                           | 4                                                            | 2                                      |
| <i>d</i> -space range                              | 0.85-14.35 Å (6-130° 2θ)                                     |                                        |
| $\chi^2$                                           | 1.69                                                         |                                        |
| $R_p$ / %                                          | 2.89                                                         |                                        |
| $R_{wp}$ / %                                       | 3.82                                                         |                                        |
| Definition of <i>R</i> factors                     | $R_p = \frac{\sum  w I_0 - I_c ^2 }{\sum  wI_0 ^2}^{1/2}$    |                                        |



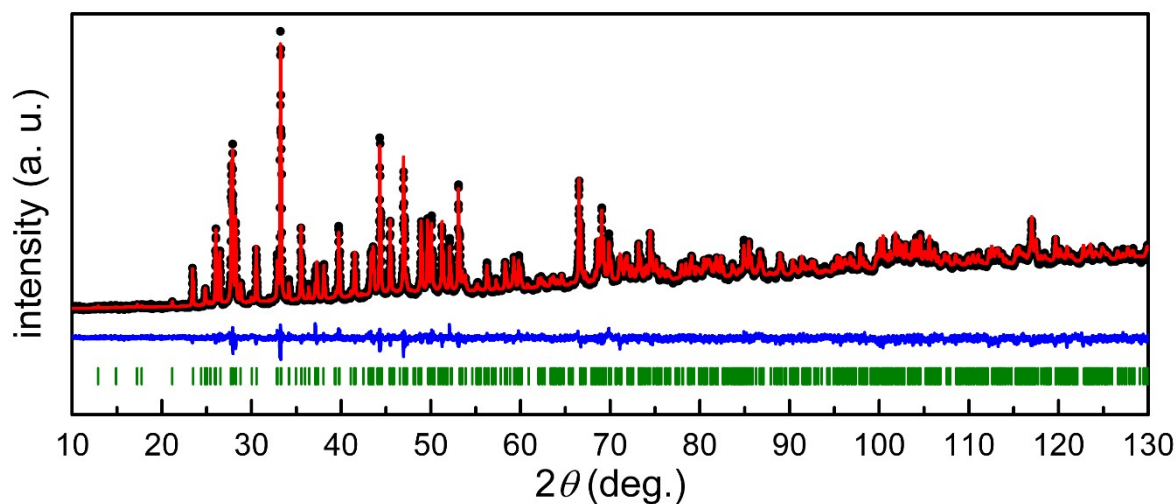

**Figure S8.** Rietveld fit of the powder X-ray diffraction pattern of  $\text{GdAl}_5\text{Pt}_3$ . Experimental data is shown as black dots, the fit as red line, the difference as blue line. The green ticks indicate the Bragg positions for  $\text{GdAl}_5\text{Pt}_3$ .

| <b>Refinement details for the data shown in Figure S8</b> |                                                                                                                                         |
|-----------------------------------------------------------|-----------------------------------------------------------------------------------------------------------------------------------------|
| Source                                                    | Bruker D8 ADVANCE (laboratory X-ray)                                                                                                    |
| Temperature                                               | RT                                                                                                                                      |
| Pressure                                                  | ambient                                                                                                                                 |
| Wavelengths                                               | $\text{Cu } K\alpha_1$ and $\text{Cu } K\alpha_2$ : 154.0596 and 154.4308 pm                                                            |
| Chemical formula                                          | $\text{GdAl}_5\text{Pt}_3$                                                                                                              |
| Refined amount / wt.-%                                    | 100                                                                                                                                     |
| Space group                                               | <i>Pnma</i>                                                                                                                             |
| <i>a</i> / pm                                             | 2054.93(2)                                                                                                                              |
| <i>b</i> / pm                                             | 408.65(1)                                                                                                                               |
| <i>c</i> / pm                                             | 728.29(1)                                                                                                                               |
| <i>V</i> / nm <sup>3</sup>                                | 0.6116                                                                                                                                  |
| <i>Z</i>                                                  | 4                                                                                                                                       |
| <i>d</i> -space range                                     | 0.85-14.35 Å (6-130° 2θ)                                                                                                                |
| $\chi^2$                                                  | 1.75                                                                                                                                    |
| $R_p$ / %                                                 | 2.95                                                                                                                                    |
| $R_{wp}$ / %                                              | 3.85                                                                                                                                    |
| Definition of <i>R</i> factors                            | $R_p = \frac{\sum  w I_0 - I_c ^2 }{\sum  wI_0 ^2}$ $R_{wp} = \left( \frac{\sum  w I_0 - I_c ^2 }{\sum  wI_0 ^2} \right)^{\frac{1}{2}}$ |

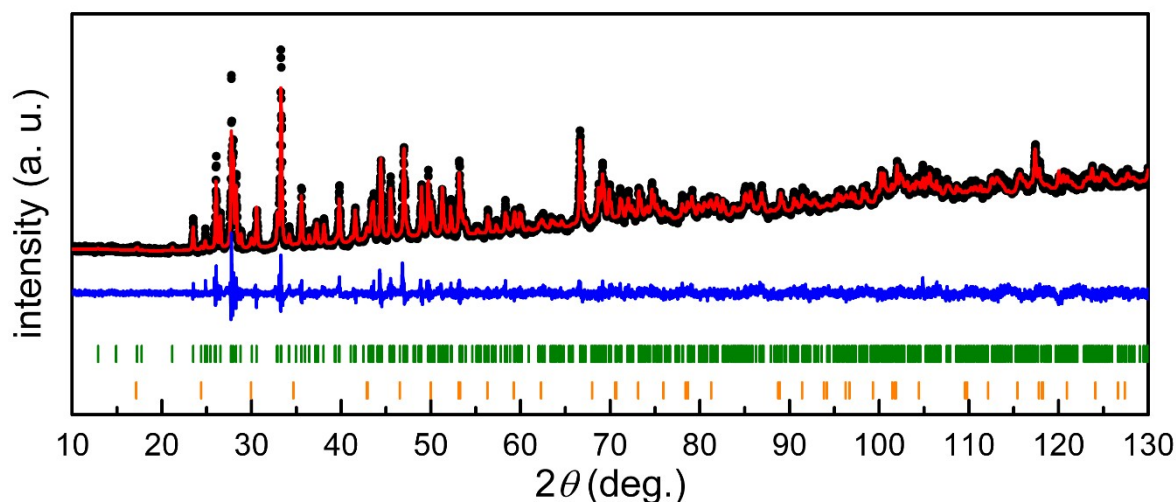

**Figure S9.** Rietveld fit of the powder X-ray diffraction pattern of  $\text{TbAl}_5\text{Pt}_3$ . Experimental data is shown as black dots, the fit as red line, the difference as blue line. The green ticks indicate the Bragg positions for  $\text{TbAl}_5\text{Pt}_3$ , the orange ticks the ones of  $\text{Al}_3\text{Pt}_2$ .

| <b>Refinement details for the data shown in Figure S9</b> |                                                                                                                                             |                          |
|-----------------------------------------------------------|---------------------------------------------------------------------------------------------------------------------------------------------|--------------------------|
| Source                                                    | Bruker D8 ADVANCE (laboratory X-ray)                                                                                                        |                          |
| Temperature                                               | RT                                                                                                                                          |                          |
| Pressure                                                  | ambient                                                                                                                                     |                          |
| Wavelengths                                               | Cu $K\alpha_1$ and Cu $K\alpha_2$ : 154.0596 and 154.4308 pm                                                                                |                          |
| Chemical formula                                          | $\text{TbAl}_5\text{Pt}_3$                                                                                                                  | $\text{Al}_3\text{Pt}_2$ |
| Refined amount / wt.-%                                    | 96(1)                                                                                                                                       | 4(1)                     |
| Space group                                               | $Pnma$                                                                                                                                      | $\bar{P}3m1$             |
| $a$ / pm                                                  | 2053.22(4)                                                                                                                                  | 421.3(2)                 |
| $b$ / pm                                                  | 407.67(1)                                                                                                                                   | 421.3(2)                 |
| $c$ / pm                                                  | 728.28(2)                                                                                                                                   | 517.0(5)                 |
| $V$ / nm <sup>3</sup>                                     | 0.6096                                                                                                                                      | 0.0795(1)                |
| $Z$                                                       | 4                                                                                                                                           | 1                        |
| $d$ -space range                                          | 0.85-14.35 Å (6-130° $2\theta$ )                                                                                                            |                          |
| $\chi^2$                                                  | 2.69                                                                                                                                        |                          |
| $R_p$ / %                                                 | 3.93                                                                                                                                        |                          |
| $R_{wp}$ / %                                              | 5.48                                                                                                                                        |                          |
| Definition of $R$ factors                                 | $R_p = \frac{\sum  w   I_0 - I_c ^2}{\sum  w I_0^2 }$ $R_{wp} = \left( \frac{\sum  w   I_0 - I_c ^2}{\sum  w I_0^2 } \right)^{\frac{1}{2}}$ |                          |

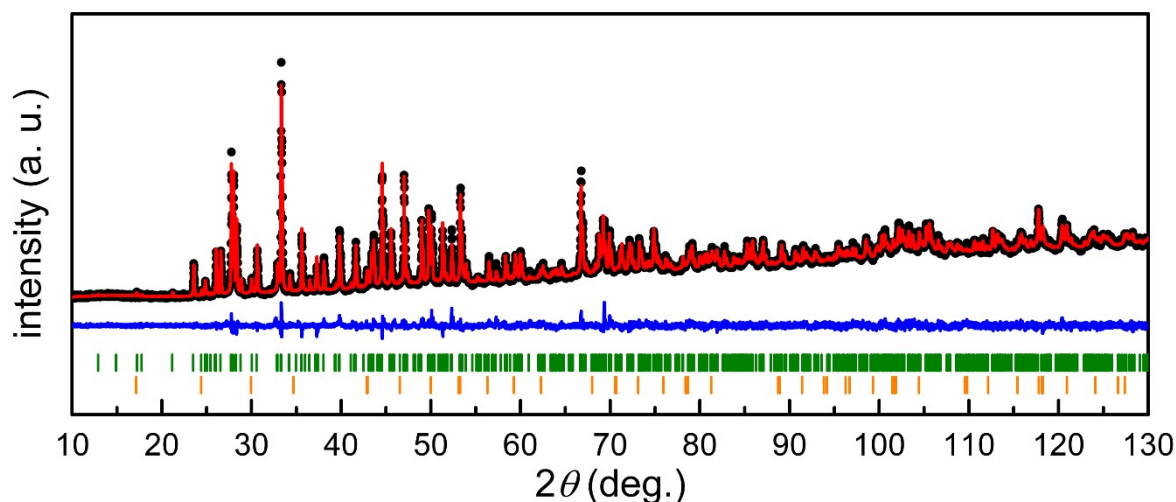

**Figure S10.** Rietveld fit of the powder X-ray diffraction pattern of  $\text{DyAl}_5\text{Pt}_3$ . Experimental data is shown as black dots, the fit as red line, the difference as blue line. The green ticks indicate the Bragg positions for  $\text{DyAl}_5\text{Pt}_3$ , the orange ticks the ones of  $\text{Al}_3\text{Pt}_2$ .

| <b>Refinement details for the data shown in Figure S10</b> |                                                              |                          |
|------------------------------------------------------------|--------------------------------------------------------------|--------------------------|
| Source                                                     | Bruker D8 ADVANCE (laboratory X-ray)                         |                          |
| Temperature                                                | RT                                                           |                          |
| Pressure                                                   | ambient                                                      |                          |
| Wavelengths                                                | Cu $K\alpha_1$ and Cu $K\alpha_2$ : 154.0596 and 154.4308 pm |                          |
| Chemical formula                                           | $\text{DyAl}_5\text{Pt}_3$                                   | $\text{Al}_3\text{Pt}_2$ |
| Refined amount / wt.-%                                     | 97(1)                                                        | 3(1)                     |
| Space group                                                | $Pnma$                                                       | $\bar{P}3m1$             |
| $a$ / pm                                                   | 2051.95(2)                                                   | 421.12(3)                |
| $b$ / pm                                                   | 406.67(1)                                                    | 421.12(3)                |
| $c$ / pm                                                   | 728.59(1)                                                    | 516.96(7)                |
| $V$ / nm <sup>3</sup>                                      | 0.6079                                                       | 0.0794                   |
| $Z$                                                        | 4                                                            | 1                        |
| $d$ -space range                                           | 0.85-14.35 Å (6-130° $2\theta$ )                             |                          |
| $\chi^2$                                                   | 1.92                                                         |                          |
| $R_p$ / %                                                  | 3.01                                                         |                          |
| $R_{wp}$ / %                                               | 4.02                                                         |                          |
| Definition of $R$ factors                                  | $R_p = \frac{\sum  w   I_0 - I_c ^2}{\sum  w I_0^2 }$        |                          |

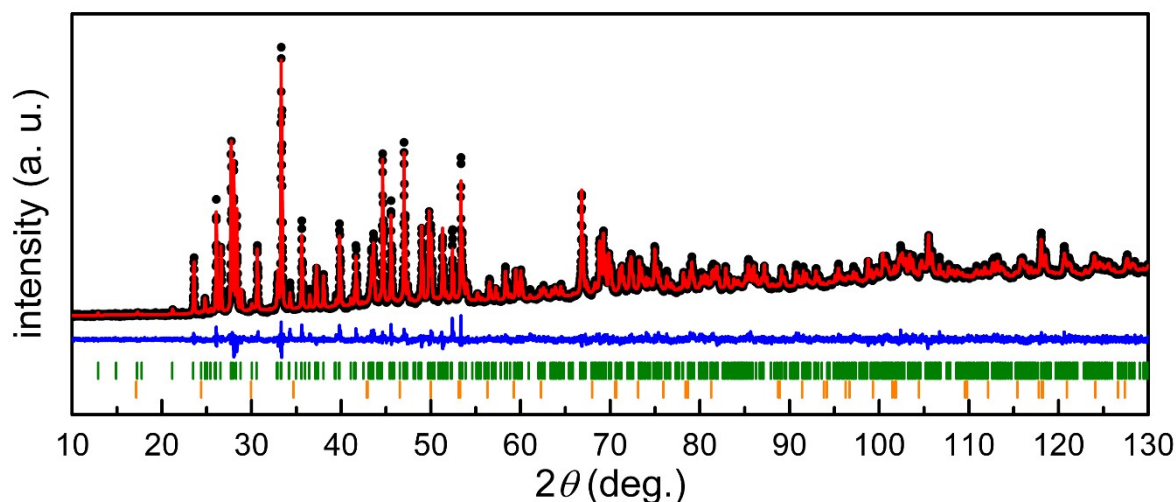

**Figure S11.** Rietveld fit of the powder X-ray diffraction pattern of  $\text{HoAl}_5\text{Pt}_3$ . Experimental data is shown as black dots, the fit as red line, the difference as blue line. The green ticks indicate the Bragg positions for  $\text{HoAl}_5\text{Pt}_3$ , the orange ticks the ones of  $\text{Al}_3\text{Pt}_2$ .

| <b>Refinement details for the data shown in Figure S11</b> |                                                              |                          |
|------------------------------------------------------------|--------------------------------------------------------------|--------------------------|
| Source                                                     | Bruker D8 ADVANCE (laboratory X-ray)                         |                          |
| Temperature                                                | RT                                                           |                          |
| Pressure                                                   | ambient                                                      |                          |
| Wavelengths                                                | Cu $K\alpha_1$ and Cu $K\alpha_2$ : 154.0596 and 154.4308 pm |                          |
| Chemical formula                                           | $\text{HoAl}_5\text{Pt}_3$                                   | $\text{Al}_3\text{Pt}_2$ |
| Refined amount / wt.-%                                     | 99(1)                                                        | 1(1)                     |
| Space group                                                | $Pnma$                                                       | $\bar{P}3m1$             |
| $a$ / pm                                                   | 2050.36(2)                                                   | 420.6(5)                 |
| $b$ / pm                                                   | 405.89(1)                                                    | 420.6(5)                 |
| $c$ / pm                                                   | 729.07(1)                                                    | 510.0(12)                |
| $V$ / nm <sup>3</sup>                                      | 0.6067                                                       | 0.0781                   |
| $Z$                                                        | 4                                                            | 1                        |
| $d$ -space range                                           | 0.85-14.35 Å (6-130° $2\theta$ )                             |                          |
| $\chi^2$                                                   | 2.15                                                         |                          |
| $R_p$ / %                                                  | 3.08                                                         |                          |
| $R_{wp}$ / %                                               | 4.09                                                         |                          |
| Definition of $R$ factors                                  | $R_p = \frac{\sum  w   I_0 - I_c ^2}{\sum  w I_0^2 }$        |                          |

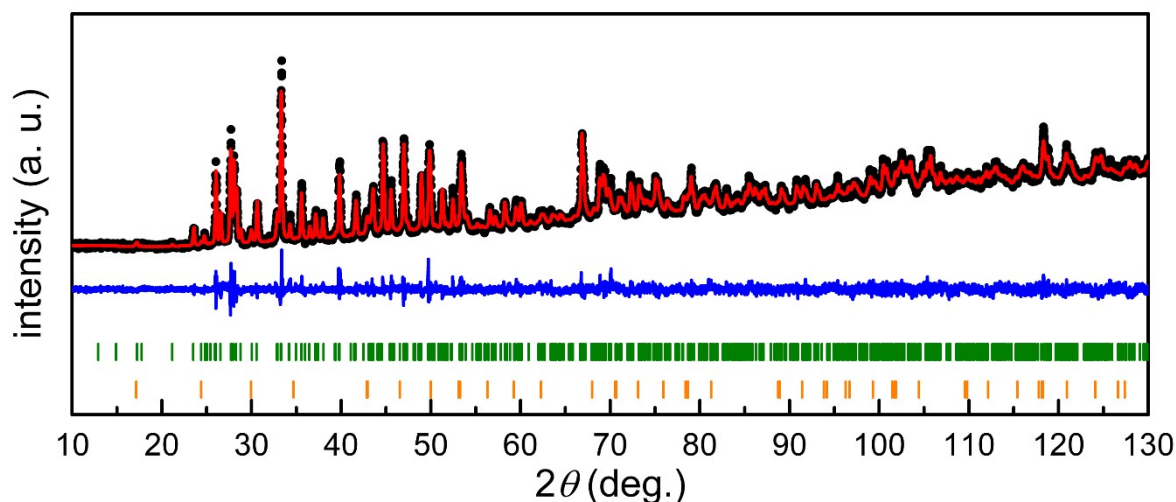

**Figure S12.** Rietveld fit of the powder X-ray diffraction pattern of  $\text{ErAl}_5\text{Pt}_3$ . Experimental data is shown as black dots, the fit as red line, the difference as blue line. The green ticks indicate the Bragg positions for  $\text{ErAl}_5\text{Pt}_3$ , the orange ticks the ones of  $\text{Al}_3\text{Pt}_2$ .

| Refinement details for the data shown in Figure S12 |                                                                                                                                              |                          |
|-----------------------------------------------------|----------------------------------------------------------------------------------------------------------------------------------------------|--------------------------|
| Source                                              | Bruker D8 ADVANCE (laboratory X-ray)                                                                                                         |                          |
| Temperature                                         | RT                                                                                                                                           |                          |
| Pressure                                            | ambient                                                                                                                                      |                          |
| Wavelengths                                         | Cu $K\alpha_1$ and Cu $K\alpha_2$ : 154.0596 and 154.4308 pm                                                                                 |                          |
| Chemical formula                                    | $\text{ErAl}_5\text{Pt}_3$                                                                                                                   | $\text{Al}_3\text{Pt}_2$ |
| Refined amount / wt.-%                              | 96(1)                                                                                                                                        | 4(1)                     |
| Space group                                         | $Pnma$                                                                                                                                       | $P\bar{3}m1$             |
| $a$ / pm                                            | 2049.24(5)                                                                                                                                   | 420.86(7)                |
| $b$ / pm                                            | 405.11(1)                                                                                                                                    | 420.86(7)                |
| $c$ / pm                                            | 729.74(2)                                                                                                                                    | 517.0(2)                 |
| $V$ / nm <sup>3</sup>                               | 0.6058                                                                                                                                       | 0.0791                   |
| $Z$                                                 | 4                                                                                                                                            | 1                        |
| $d$ -space range                                    | 0.85-14.35 Å (6-130° $2\theta$ )                                                                                                             |                          |
| $\chi^2$                                            | 2.11                                                                                                                                         |                          |
| $R_p$ / %                                           | 3.57                                                                                                                                         |                          |
| $R_{wp}$ / %                                        | 4.78                                                                                                                                         |                          |
| Definition of $R$ factors                           | $R_p = \frac{\sum  w   I_0 - I_c ^2}{\sum  w I_0^2 };$ $R_{wp} = \left( \frac{\sum  w   I_0 - I_c ^2}{\sum  w I_0^2 } \right)^{\frac{1}{2}}$ |                          |
